# Supplementary material for: Different Shades of Listeria monocytogenes: Strain, Serotype, and Lineage-Based Variability in Virulence and Stress Tolerance Profiles
Source: Front Microbiol. 2022 Jan 4;12:792162. doi: 10.3389/fmicb.2021.792162 (PMC8764371; doi:10.3389/fmicb.2021.792162)
Supplement: Supplementary file 2 [file Data_Sheet_1.xlsx]

## Sheet: Table S4 to S9
Key
Classification	Strain
Lineage I	F2365, LL195, N11-2292, N11-2747, N12-0551, N12-1339, N12-0605, N12-0341, N13-0047, N12-1996, Scott A, N13-1054, N12-0432, N12-0973, N11-1846, N12-0466, N12-1608, N2306, N12-0320, N12-0794, N13-2107, N12-1772, N16-0044, N11-2801, N12-1387, N11-1850, N11-2675, H34
Lineage III	WLSC1019, WLSC1020, LMNC318, LMNC326
CC1	F2365,LL195, N11-2292, N11-2747, N12-0551, N12-1339, N12-0605, N12-0341, N13-0047, N12-1996
CC2	Scott A, N13-1054, N12-0432, N12-0973, N11-1846, N12-0466
CC4	N2306, N12-0320, N12-0794, N13-2107, N12-1772
CC6	N16-0044, N11-2801, N12-1387
CC8	N1546, N11-1584, N11-1617, N11-1649, N11-1346
CC9	EGDe,N12-0486, N13-0001, N11-1514, N11-1837, N12-1921
CC121	N11-1905, N12-1024, N13-0119, N12-0367
CC412	N843_10, N843_15, N12-1273
Table S4. PrfA amino acid sequence comparison
Amino acid position and substitution1	Type of amino acid substitution	Strains	Remarks
Y37C	Non-conservative	N11-1850	Does not cause any changes to the predicted protein structure
K156E	Non-conservative	WLSC1020	Does not cause any changes to the predicted protein structure
T165A	Non-conservative	Lineage III except WLSC1020	Does not cause any changes to the predicted protein structure
L174S	Non-conservative	N05-195
Y176V	Non-conservative	N05-195
S177R	Non-conservative	N05-195
S178I	Non-conservative	N05-195
G179F	Non-conservative	N05-195
I180K	Non-conservative	N05-195
I181W	Non-conservative	N05-195
S183R	Non-conservative	N05-195
S184T	Conservative	N05-195
A185*	PMSC	N05-195	PMSC arising due to a 7 nucleotide insertion between nucleotide 520 and 521
K197N	Non-conservative	Lm3136 & Lineage III strains	Does not cause any changes to the predicted protein structure
L227*	PMSC	N843_10, N843_15	PMSC arising due to a single nucleotide (T) deletion at position 680
1 Amino acid positions are relative to L. monocytogenes EGDe PrfA protein
Table S5: Listeriolysin O amino acid sequence comparison
Amino acid position and substitution1	Type of amino acid substitution	Strains	Remarks
V14I	Conservative	Lineage III strains
N31H	Non-Conservative	N11-1850, CC4, CC6, and Lineage III strains except WLSC1019
N34D	Non-Conservative	Lineage III strains except WLSC1019
S35L	Non-Conservative	Lineage I & Lineage III strains except WLSC1019
M39I	Non-Conservative	F2365
I433V	Conservative	N11-2183, CC412 strains
V438I	Conservative	Lineage I & III strains
T494M	Non-Conservative	N11-1850
K523S	Non-Conservative	Lineage I & III strains
1 Amino acid positions are relative to L. monocytogenes EGDe LLO protein
Table S6. PlcA amino acid sequence comparison
Amino acid position and substitution1	Type of amino acid substitution	Strains	Remarks
N4I	Non-Conservative	N05-195, 10403S, Lm3136, N11-1515, LMNC318, LMNC326, CC8 strains
Q7R	Non-Conservative	N05-195, 10403S, Lm3136, N11-1515, LMNC318, LMNC326, CC8 strains
L13V	Conservative	N05-195, 10403S, Lm3136, N11-1515, LMNC318, LMNC326, CC8, lineage I strains
I17V	Conservative	Lm3136, N11-2183, CC412 strains
Y19C	Non-Conservative	N05-195, 10403S, Lm3136, N11-1515, LMNC318, LMNC326, CC8 & lineage I strains
N57S	Non-Conservative	WLSC1019, WLSC1020, & Lineage I strains
L61I	Non-Conservative	WLSC1019, WLSC1020
I76M	Non-Conservative	WLSC1020, N11-2183, 10403S, Lm3136, & lineage I strains
N112K	Non-Conservative	N05-195, WLSC1020, N11-2183, 10403S, Lm3136, & lineage I strains
F119Y	Conservative	Lm3136, N11-2183, N05-195, 10403S, Lm3163, & CC412 strains
T178N	Non-Conservative	WLSC1019
V190I	Conservative	Lineage III
R211H	Non-Conservative	Lineage I & III strains except N11-2675
R211N	Non-Conservative	N11-2675
P220S	Non-Conservative	Lineage I & III strains
T235K	Non-Conservative	WLSC1019
V291I	Conservative	LMNC318, LMNC326
T306I	Non-Conservative	Lm3136
1 Amino acid positions are relative to L. monocytogenes EGDe PlcA protein
Table S7: PlcB amino acid sequence comparison
Amino acid position and substitution1	Type of amino acid substitution	Strains	Remarks
M1V	Non-Conservative	Lineage I & III strains
K5N	Non-Conservative	10403S
I13T	Non-Conservative	all strains except CC9 strains
V21I	Conservative	Lm3163
N26S	Non-Conservative	WLSC1019, lineage I strains
Q34K	Non-Conservative	Lineage I & III strains
T35P	Non-Conservative	Lineage I & III strains
A37T	Non-Conservative	Lineage III except WLSC1019
A37*	PMSC	H34	Trucated protein 36aa long due to a single nucleotide "C" deletion at position 108
D61E	Conservative	CC1 strains only
N81D	Non-Conservative	Lineage I & III strains
K93N	Non-Conservative	Lineage I & III strains
R126K	Conservative	Lineage I & III strains
T150A	Non-Conservative	Lineage I & III strains
A215V	Non-Conservative	Lineage I & III strains
K216Q	Non-Conservative	N11-1850, CC4 strains
D221N	Non-Conservative	Lineage I & III except WLSC1019
D225E	Conservative	Lineage I strains
1 Amino acid positions are relative to L. monocytogenes EGDe PlcB protein
Table S8: Mpl amino acid sequence comparison
Amino acid position and substitution1	Type of amino acid substitution	Strains	Remarks
T19N	Non-Conservative	Lineage I strains
T21A	Non-Conservative	Lineage I strains
K31R	Conservative	Lineage I & III strains
Q33R	Non-Conservative	Lineage I strains
N35D	Non-Conservative	N11-1850, CC4 strains
T36I	Non-Conservative	Lineage I & III strains
K40R	Conservative	Lineage I & III strains except WLSC1019
T41N	Non-Conservative	Lineage I & III strains except WLSC1019
P42H	Non-Conservative	WLSC1019
A47T	Non-Conservative	CC1 strains
G83E	Non-Conservative	Lineage I strains
T103A	Non-Conservative	CC2, CC6 strains
R115K	Conservative	WLSC1019, WLSC1020
I122M	Non-Conservative	Lineage III strains
V146I	Conservative	Lineage I & III strains
L157I	Conservative	Lineage I & III strains
K162R	Conservative	LMNC318, LMNC326
V182I	Conservative	Lineage I & III strains
V186A	Non-Conservative	N11-1515, Lm3163, 10403S, Lm3136, N05-195, Lineage I & III strains
R203A	Non-Conservative	LMNC318, LMNC326
R203P	Non-Conservative	WLSC1019
D209E	Conservative	LMNC318, LMNC326
K251N	Non-Conservative	Lineage I & III strains
N253K	Non-Conservative	Lineage I & III strains
T256A	Non-Conservative	Lineage I & III strains
E289D	Non-Conservative	Lineage I strains
Q325R	Non-Conservative	Lineage I & III strains
S399L	Non-Conservative	Lineage I strains
E423A	Non-Conservative	Lineage III strains
L427I	Conservative	All strains except CC9 strains
Y438F	Conservative	Lineage I & III strains
S475A	Non-Conservative	Lineage I strains
K498I	Non-Conservative	WLSC1020
1 Amino acid positions are relative to L. monocytogenes EGDe Mpl protein
Table S9: ActA amino acid sequence comparison
Amino acid position and substitution1	Type of amino acid substitution	Strains	Remarks
K73E	Non-Conservative	10403S, Lineage I & III strains
R82K	Conservative	Lineage I & III strains
E95A	Non-Conservative	Lm3136, 10403S, Lineage I & III strains
K96E	Non-Conservative	N11-2183
I103N	Non-Conservative	N05-195, 10403S, N11-1515, N11-2183, Lm3163, CC8 strains
S108G	Non-Conservative	N05-195, 10403S, N11-1515, N11-2183, Lm3163, CC8 strains
E112G	Non-Conservative	N05-195, 10403S, N11-1515, N11-2183, Lm3163, CC8 strains
A114V	Non-Conservative	N05-195, 10403S, N11-1515, N11-2183, Lm3163, CC8 & Lineage I strains
G122E	Non-Conservative	Lineage III strains except WLSC1019
A123V	Non-Conservative	N05-195, 10403S, N11-1515, N11-2183, Lm3163, CC8 strains
A123S	Non-Conservative	Lineage I strains
A127T	Non-Conservative	10403S, N11-1515, N11-2183, Lm3163, CC8 strains
I128L	Conservative	10403S, N11-1515, N11-2183, Lm3163, CC8 strains
P138S	Non-Conservative	N11-1515, 10403S, Lineage III strains except WLSC1019
P165L	Non-Conservative	Lineage III strains
V171A	Non-Conservative	N05-195, 10403S, N11-1515, Lineage I & III strains
N172T	Non-Conservative	Lineage I strains
K174R	Conservative	N05-195, 10403S, N11-1515
E179A	Non-Conservative	WLSC1019, Lineage I strains
S180L	Non-Conservative	Lineage III strains except WLSC1019
A182V	Non-Conservative	N05-195, 10403S, N11-1515
A182T	Non-Conservative	WLSC1019, Lineage I strains
A184T	Non-Conservative	WLSC1019, Lineage I strains
S200T	Conservative	N05-195, 10403S, N11-1515, WLSC1019, Lineage I strains
Q209K	Non-Conservative	N05-195, 10403S, N11-1515
S244G	Non-Conservative	WLSC1019
S257N	Non-Conservative	Lineage I & III strains
S263L	Non-Conservative	Lineage III strains except WLSC1019
P267A	Non-Conservative	Lineage III strains
A291V	Non-Conservative	Lineage III strains except WLSC1019
A291T	Non-Conservative	Lm3136, 10403s, N11-1515, & CC412 strains
A291----------25aa deletion	Non-Conservative	N05-195
T292P		10403S, N11-1515
306-----------35aa deletion	Non-Conservative	H34, WLSC1019, Scott A, CC1, CC4 strains
317----------10aa deletion	Non-Conservative	N05-195
M318K	Non-Conservative	Lineage III strains except WLSC1019
A326V	Non-Conservative	Lineage III strains except WLSC1019
A326T	Non-Conservative	CC412 strains
I347M	Non-Conservative	N05-195, 10403S, N11-1515, Lineage I & III strains
E349G	Non-Conservative	Lineage III strains except WLSC1019
S352P	Non-Conservative	N05-195, 10403S, N11-1515, Lineage I & III strains
R360S	Non-Conservative	N05-195, 10403S, N11-1515, Lineage I & III strains
L366S	Non-Conservative	ScottA
N368S	Non-Conservative	N05-195, 10403S, N11-1515, Lineage I & III strains
Q375E	Non-Conservative	N05-195, 10403S, N11-1515, WLSC1019
P382L	Non-Conservative	CC1 strains
I383M	Non-Conservative	Lineage I strains except N11-1850
R392G	Non-Conservative	N11-2183, Lm3163, CC412 strains
G394D	Non-Conservative	N11-2183, Lm3163, CC412 strains
R395I	Non-Conservative	Lineage I strains
E400G	Non-Conservative	N11-2183, Lm3163, CC412 strains
L404M	Non-Conservative	N11-2183, Lm3163, CC412 strains
S415I	Non-Conservative	N11-2183
E420A	Non-Conservative	CC412 strains
A426T	Non-Conservative	CC6 strains
A449T	Non-Conservative	Lm3136, N11-1515, Lineage I & III strains
A449I	Non-Conservative	N11-2183, Lm3163, 10403S, N05-195, CC412 strains
S457T	Conservative	N11-2183, Lm3163, 10403S, N05-195, N11-2675, CC2, CC6, & CC412 strains
S461P	Non-Conservative	N11-2183, Lm3163, 10403S, N05-195, N11-2675, CC2, & CC412 strains
S470N	Non-Conservative	WLSC1020
S470T	Conservative	Lineage I strains
T476A	Non-Conservative	N05-195, 10403S, N11-2183, Lm3163, WLSC1019, WLSC1020, CC412, & Lineage I strains
K479E	Non-Conservative	WLSC1019
S482P	Non-Conservative	Lineage I & III strains
V497A	Non-Conservative	Lineage I & III strains
T498P	Non-Conservative	Lineage I strains
T498S	Conservative	Lineage III strains
P501I	Non-Conservative	Lineage I & III strains
K505N	Non-Conservative	Lineage I & III strains
A507S	Non-Conservative	WLSC1019
V522A	Non-Conservative	Lineage I & III strains except CC2, CC4, & CC6 strains
V522E	Non-Conservative	CC2, CC4, & CC6 strains
R524G	Non-Conservative	Lineage I & III strains
T528A	Non-Conservative	Lineage I & III strains
T537P	Non-Conservative	Lineage III strains
K539N	Non-Conservative	Lineage I & III strains
Q540R	Non-Conservative	Lineage I strains
S54IP	Non-Conservative	Lineage I & III strains
N543D	Non-Conservative	Lineage I & III strains
A554V	Non-Conservative	Lineage I & III strains
S557R	Non-Conservative	Lineage I & III strains
D558N	Non-Conservative	Lineage I & III strains
E568G	Non-Conservative	N11-2675
M570V	Non-Conservative	Lineage I strains
E572G	Non-Conservative	Lineage I & III strains
S576P	Non-Conservative	Lineage I & III strains
A580V	Non-Conservative	Lineage I & III strains
N584K	Non-Conservative	Lineage I & III strains
P608S	Non-Conservative	N11-1515, Lineage III strains
I621M	Non-Conservative	Lineage III strains
F629V	Non-Conservative	Lineage I strains
N639S	Non-Conservative	Lineage I & III strains
1 Amino acid positions are relative to L. monocytogenes EGDe ActA protein
	ActA length (aa)
	604	Scott A, H34, N05-195, WLSC1019, CC4 strains
	605	CC1 strains
	630	CC2 strains except Scott A
	639	N11-1850, CC6, lineage II & III strains except WLSC1019

## Sheet: Table S10 to S17
Table S10. Internalin A amino acid sequence comparison
Amino acid position and substitution1	Type of amino acid substitution	Strains	Remarks
R3K	Conservative	Lineage I & III strains
F19Y	Non-conservative	WLSC1019, WLS1020
I44V	Conservative	CC4 only
T51A	Non-conservative	10403S, N11-2183, N11-1515, N05-195, Lm3163, CC121 strains
V94L	Conservative	10403S, Lm3136, CC8, lineage I & III strains
N118D	Non-conservative	10403S, Lm3136, CC8, lineage I & III strains
T142S	Non-conservative	CC1 & CC2 strains
I157L	Conservative	N11-2183, N11-1515, N05-195
S187N	Non-conservative	10403S, Lm3136, CC4, CC8, & lineage III strains
Q188*	PMSC	N05-195	Truncation arising due to a SNP C565T which created a PMSC
S192F	Non-conservative	CC8 strains
N381S	Non-conservative	WLSC1019
A416E	Non-conservative	Lineage I & III strains except WLSC1019
A420P	Non-conservative	Lineage I & III strains except WLSC1020
A426V	Non-conservative	Lineage I & III strains except WLSC1021
T454A	Non-conservative	10403S, N11-2183, N11-1515, CC121, Lineage I & III strains
T472A	Non-conservative	WLSC1020
S474N	Non-conservative	N11-2183, N11-1515, CC121, Lineage I & III strains
P476S	Non-conservative	N11-2183, N11-1515, Lineage I & III strains
Q4928	PMSC	CC121 strains	Truncation arising due to a SNP C1474T which created a PMSC
V500A	Non-conservative	All strains except CC9 & Lm3136
H530Y	Non-conservative	N11-1515, Lineage I & III strains except WLSC1020
V533I	Conservative	N11-1515, & CC6 strains
Q539K	Non-conservative	N11-1515
K544N	Non-conservative	CC6 strains
N546-	Non-conservative	N12-0486, N11-1837, N13-0001, N11-1514 (These are all CC9 strains)	N deletion arising due to nucleotide A1637 deletion
F547I	Non-conservative	N12-0486, N11-1837, N13-0001, N11-1514 (These are all CC9 strains)
T549V	Non-conservative	N12-0486, N11-1837, N13-0001, N11-1514 (These are all CC9 strains)
D550R	Non-conservative	N12-0486, N11-1837, N13-0001, N11-1514 (These are all CC9 strains)
K551I	Non-conservative	N12-0486, N11-1837, N13-0001, N11-1514 (These are all CC9 strains)
M552K	Non-conservative	N12-0486, N11-1837, N13-0001, N11-1514 (These are all CC9 strains)
P553C	Non-conservative	N12-0486, N11-1837, N13-0001, N11-1514 (These are all CC9 strains)
T554R	Non-conservative	N12-0486, N11-1837, N13-0001, N11-1514 (These are all CC9 strains)
N555Q	Conservative	N12-0486, N11-1837, N13-0001, N11-1514 (These are all CC9 strains)
D556M	Non-conservative	N12-0486, N11-1837, N13-0001, N11-1514 (These are all CC9 strains)
I557T	Non-conservative	N12-0486, N11-1837, N13-0001, N11-1514 (These are all CC9 strains)
N558S	Non-conservative	N12-0486, N11-1837, N13-0001, N11-1514 (These are all CC9 strains)
N558D	Non-conservative	N11-1515, Lineage I & III strains
Y5591	Conservative	N12-0486, N11-1837, N13-0001, N11-1514 (These are all CC9 strains)
A561M	Non-conservative	N12-0486, N11-1837, N13-0001, N11-1514 (These are all CC9 strains)
Q562H	Non-conservative	N12-0486, N11-1837, N13-0001, N11-1514 (These are all CC9 strains)
F563N	Non-conservative	N12-0486, N11-1837, N13-0001, N11-1514 (These are all CC9 strains)
S564L	Non-conservative	N12-0486, N11-1837, N13-0001, N11-1514 (These are all CC9 strains)
S564N	Non-conservative	WLSC1020
I565V	Conservative	N12-0486, N11-1837, N13-0001, N11-1514 (These are all CC9 strains)
N566-	Non-conservative	N12-0486, N11-1837, N13-0001, N11-1514 (These are all CC9 strains)
S567-	Non-conservative	N12-0486, N11-1837, N13-0001, N11-1514 (These are all CC9 strains)
Y568L	Non-conservative	N12-0486, N11-1837, N13-0001, N11-1514 (These are all CC9 strains)
F572Q	Non-conservative	N12-0486, N11-1837, N13-0001, N11-1514 (These are all CC9 strains)
F572L	Non-conservative	N11-1515, & CC6 strains
D573E	Conservative	N11-2183, 10403S, & CC412 strains
D573Q	Non-conservative	N12-0486, N11-1837, N13-0001, N11-1514 (These are all CC9 strains)
N574P	Non-conservative	N12-0486, N11-1837, N13-0001, N11-1514 (These are all CC9 strains)
D575L	Non-conservative	N12-0486, N11-1837, N13-0001, N11-1514 (These are all CC9 strains)
G576I	Non-conservative	N12-0486, N11-1837, N13-0001, N11-1514 (These are all CC9 strains)
V577M	Non-conservative	N12-0486, N11-1837, N13-0001, N11-1514 (These are all CC9 strains)
T579V	Non-conservative	N12-0486, N11-1837, N13-0001, N11-1514 (These are all CC9 strains)
S580*	PMSC	N12-0486, N11-1837, N13-0001, N11-1514 (These are all CC9 strains)	Trucanted at 576aa long due to a deletion at position A1637 that caused a frame shift resulting in a PMSC down stream
V583A	Non-conservative	LMNC318, LMNC326
A594P	Non-conservative	Lm3163, N11-2183, 10403S, CC8 & CC412 strains
V644I	Conservative	N11-2183, & CC412 strains
S648T	Conservative	All strains except EGDe, N12-1921, 10403S, Lm3163, & Lm3136
T649M	Non-conservative	WLSC1020
A652T	Non-conservative	N11-2183, & CC412 strains
A664T	Non-conservative	N11-1515, CC8, Lineage I & III
T671A	Non-conservative	CC6 strains
K683T	Non-conservative	N11-1850
K683E	Non-conservative	Lm3163
W685*	PMSC	N12-1921	Trucanted at 684aa long due to to a SNP G2054A which created a PMSC
P729S	Non-conservative	Lineage III strains except WLSC1020
D738N	Non-conservative	Lineage I & III strains
N741-	Non-conservative	CC6 strains	Arising due to 3 nucleotide (TAA) deletion at 2220, 2221, 2222
T742-	Non-conservative	CC6 strains	Arising due to 3 nucleotide (CAC) deletion at 2223, 2224, 2225
S743-	Non-conservative	CC6 strains	Arising due to 3 nucleotide (ATC) deletion at 2226, 2227, 2228
E764A	Non-conservative	N11-2675
D774Y	Non-conservative	CC4 & CC6 strains
L781I	Conservative	Lineage I & III strains
M790V	Non-Conservative	Lineage I & III strains
1 Amino acid positions are relative to L. monocytogenes EGDe InlA protein
Table S11. InlB amino acid sequence comparison
Amino acid position and substitution1	Type of amino acid substitution	Strains	Remarks
H5Y	Non-conservative	H34
N6D	Non-conservative	N11-2183
Y11N	Non-conservative	WLSC1019
Q34*	PMSC	F2365	SNP C100T resulted in a PMSC truncating F2365 InlB at 33aa long
P41S	Non-conservative	10403S, CC2, CC4, CC6, & CC8 strains
S49P	Non-conservative	10403S, CC8, lineage I & III strains
A69L	Non-conservative	Lineage I & III strains
T71A	Non-conservative	WLSC1019
N73S	Non-conservative	lineage I & III strains except WLSC1019
S77G	Non-conservative	WLSC1019
V91I	Conservative	H34, N11-1850, N11-2675, N12-1608, CC1, & lineage III strains
A117T	Non-conservative	N05-195, N11-2183, Lm3163, N11-1515, 10403S, & CC8 strains
L119S	Non-conservative	Lineage III strains
V132I	Conservative	N05-195, N11-2183, Lm3163, N11-1515, 10403S, WLSC1019, CC8, CC412 & Lineage I strains
L138I	Non-conservative	N11-1850, CC2, CC4, & CC6 strains
P164L	Non-conservative	H34, N11-2675, & CC1 strains
I176L	Conservative	Lineage I & III strains
V181I	Conservative	Lineage I & III strains
K187Q	Non-conservative	lineage III strains except WLSC1020
Q197E	Non-conservative	WLSC1019, WLSC1020, Lineage I strains
P203S	Non-conservative	LMNC318, LMNC326
A205S	Non-conservative	Lineage I & III strains
V234I	Conservative	N05-195
P246S	Non-conservative	Lineage I & III strains
H249Y	Non-conservative	WLSC1020
T251M	Non-conservative	CC1 strains
T262A	Non-conservative	N05-195
T262I	Non-conservative	Lineage I & III strains
T291I	Non-conservative	Lineage I & III strains
I297V	Conservative	Lineage III strains
I304V	Conservative	Lineage I & III strains
N371D	Non-conservative	H34, N11-2675, & CC4 strains
N373S	Non-conservative	Lineage I & III strains
V387M	Non-conservative	Lineage I except N11-1850 & CC2 strains
V387I	Conservative	N11-1850 & CC2 strains
A390V	Non-conservative	H34, N11-2675, & CC412 strains
A396T	Non-conservative	10403S
A410*	PMSC	N12-1608	Trucanted at 396aa long due to a deletion at position A1094 that caused a frame shift resulting in a PMSC down stream
R439K	Conservative	CC412 strains
G445S	Non-conservative	N11-1850, CC2, Lineage III strains
K446E	Non-conservative	Lineage I & III strains except N11-2675 & H34
M470I	Non-conservative	Lineage I & III strains
R483K	Conservative	Lineage I & III strains
S486P	Non-conservative	Lineage I & III strains except N11-2675 & H34
S486L	Non-conservative	N11-2675 & H34
S489A	Non-conservative	Lineage I & III strains
K501T	Non-conservative	Lineage I & III strains except N11-2675 & H34
H502L	Non-conservative	Lineage I & III strains except N11-2675 & H34
G533D	Non-conservative	Lineage I & III strains except N11-2675 & H34
V536T	Non-conservative	LMNC318, LMNC326
K555I	Non-conservative	Lineage I & III strains except N11-2675 & H34
T557I	Non-conservative	Lineage I & III strains except N11-2675 & H34
R558Q	Non-conservative	Lineage I & III strains except N11-2675 & H34
L559V	Conservative	LMNC318, LMNC326
S564N	Non-conservative	N11-1850 & CC2 strains
N566S	Non-conservative	N11-2675 & H34
A568G	Non-conservative	Lineage I & III strains
G569N	Non-conservative	Lineage I & III strains
S571A	Non-conservative	Lineage I & III strains
A578V	Non-conservative	Lineage I & III strains except N11-2675 & H34
N580S	Non-conservative	Lineage I & III strains except N11-2675 & H34
V582I	Conservative	Lineage I & III strains except N11-2675 & H34
R584W	Non-conservative	Lineage I & III strains except N11-2675 & H34
A588T	Non-conservative	WLSC1019
K594T	Non-conservative	Lineage I & III strains except N11-2675 & H34
C599R	Non-conservative	Lineage I & III strains except N11-2675 & H34
Q600T	Non-conservative	Lineage I & III strains except N11-2675 & H34
I603V	Conservative	Lineage I & III strains
G619C	Non-conservative	N12-1273
A624T	Non-conservative	Lineage III strains
R627S	Non-conservative	Lineage III strains
A628T	Non-conservative	Lineage III strains
1 Amino acid positions are relative to L. monocytogenes EGDe InlB protein
Table S12. PgdA amino acid sequence comparison
Amino acid position and substitution1	Type of amino acid substitution	Strains	Remarks
L8I	Conservative	N05-195, Lm3163, N11-2183, Lm3136, CC8, & Lineage III strains
A12T	Non-conservative	Lineage I & III strains
I13V	Conservative	N05-195, Lm3163, N11-2183, Lm3136, N11-1515, CC8, & Lineage I strains
I21V	Conservative	Lineage I & III strains
Q49R	Non-conservative	N05-195
G52D	Non-conservative	Lineage III strains
N62D	Non-conservative	Lineage III strains
T74A	Non-conservative	Lineage III strains
E75T	Non-conservative	Lineage III strains
K77E	Non-conservative	WLSC1020
G87E	Non-conservative	Lineage I & III strains
T90K	Non-conservative	Lineage III strains
D91A	Non-conservative	Lineage III strains
A92E	Non-conservative	Lineage III strains
E102D	Conservative	Lineage III strains
T103K	Non-conservative	Lineage III strains
H114E	Non-conservative	Lineage III strains
R115K	Non-conservative	Lineage III strains
A120V	Non-conservative	Lineage III strains
I121V	Conservative	Lineage III strains
R135K	Conservative	Lineage III strains
K148Q	Non-conservative	Lineage III strains
A158T	Non-conservative	N11-2183
S169N	Non-conservative	Lineage III strains
N170D	Non-conservative	Lineage III strains
Q171E	Non-conservative	Lineage III strains
T178S	Conservative	Lineage III strains
E182Q	Non-conservative	Lineage III strains
D189G	Non-conservative	Lineage I strains
S191A	Non-conservative	Lineage III strains
L192V	Conservative	Lineage III strains
K200N	Non-conservative	Lineage III strains
K200E	Non-conservative	Lineage I strains
N208D	Non-conservative	Lineage III strains
I214L	Conservative	Lineage III strains
I219L	Conservative	Lineage I & III strains
L221V	Conservative	Lineage III strains
K224E	Non-conservative	Lineage III strains
A228S	Non-conservative	Lineage III strains
P229S	Non-conservative	Lineage III strains
P229L	Non-conservative	N11-1850
K232N	Non-conservative	Lineage I strains
K237Q	Non-conservative	Lineage III strains
A239V	Non-conservative	Lm3136 & CC412 strains
D240N	Non-conservative	Lineage III strains
S278A	Non-conservative	Lineage I & III strains
H291Y	Non-conservative	Lineage III strains
N292D	Non-conservative	Lineage III strains
I305V	Conservative	Lineage III strains
E316D	Non-conservative	Lineage III strains
Q334L	Non-conservative	Lineage III strains
T336K	Non-conservative	Lineage III strains
K345Q	Non-conservative	Lineage III strains
A349V	Non-conservative	Lineage III strains
Q371E	Non-conservative	Lineage III strains
K391R	Conservative	Lineage III strains
Y392N	Non-conservative	Lineage I & III strains
R393K	Conservative	Lineage I & III strains
I397V	Non-conservative	Lineage III strains
K400Q	Non-conservative	Lineage III strains
T427E	Non-conservative	Lineage III strains
T427A	Non-conservative	Lineage I strains
T430K	Non-conservative	Lineage III strains
K431Q	Non-conservative	Lineage III strains
S434N	Non-conservative	Lm3136 & Lineage I strains
D461E	Conservative	Lineage III strains
1 Amino acid positions are relative to L. monocytogenes EGDe PgdA protein
Table S13. OatA amino acid sequence comparison
Amino acid position and substitution1	Type of amino acid substitution	Strains	Remarks
D65T	Non-conservative	Lineage III strains
I89V	Conservative	Lineage III strains except WLSC1020
S96A	Non-conservative	Lineage I strains
L154M	Non-conservative	Lineage III strains
V186I	Conservative	Lineage III strains
D211*	PMSC	N12-0431	Trucanted at 210aa long due to a single nucleotide "A" insertion between 506 and 507 that caused a frame shift resulting in a PMSC down stream
S214A	Non-conservative	All strains except CC9 strains
R233K	Conservative	Lineage III strains
A237S	Non-conservative	CC2 & CC6 strains
I326L	Conservative	Lineage III strains
I375V	Conservative	Lineage III strains
V381I	Conservative	Lineage III strains
A388T	Non-conservative	WLSC1020
S402T	Conservative	Lineage III strains
P425A	Non-conservative	Lineage III strains except WLSC1020
P425E	Non-conservative	WLSC1020
D426E	Conservative	Lineage III strains
E427T	Non-conservative	Lineage III strains
D431T	Non-conservative	Lineage III strains
433DK443 insertion	Non-conservative	Lineage I strains	aa insertions arising due to a 6 nucleotide "CAAAGA" insertion between 1301 and 1302
442EA443 insertion	Non-conservative	Lineage III strains	aa insertions arising due to a 6 nucleotide "AGCAGA" insertion between 1301 and 1302
E434D	Conservative	Lineage III except WLSC1019
D435E	Conservative	Lineage III except WLSC1019
T438A	Non-conservative	Lineage III strains
D440E	Conservative	Lineage I & III strains
442DSKE443 insertion	Non-conservative	Lineage I strains	aa insertions arising due to a 12 nucleotide "ACTCCAAAGAAA" insertion between 1327 and 1328
442NSKE443 insertion	Non-conservative	Lineage III strains	aa insertions arising due to a 12 nucleotide "ACTCGAAAGAAA" insertion between 1327 and 1328 and a SNP G1327A
A443T	Non-conservative	Lineage I & III strains
S445A	Non-conservative	Lineage I strains
S445T	Conservative	Lineage III except WLSC1019
S449G	Non-conservative	Lineage III except WLSC1019
S449N	Conservative	Lineage I strains
E450G	Non-conservative	Lineage I & III strains
K452D	Non-conservative	Lineage III strains
K452N	Non-conservative	Lineage I strains
E453Q	Non-conservative	Lineage I strains
Q455P	Non-conservative	Lineage III strains
K456E	Non-conservative	Lineage III strains
K456V	Non-conservative	Lineage I strains
N461D	Non-conservative	Lineage III strains
S463T	Conservative	Lineage I strains
T466A	Non-conservative	Lineage III strains
K468T	Non-conservative	Lineage III strains
T469P	Non-conservative	Lineage III strains
I470T	Non-conservative	Lineage III strains
I470M	Non-conservative	Lineage I strains
I496V	Conservative	Lineage III strains
D539E	Conservative	Lineage I strains
D567E	Conservative	Lineage III strains
N574T	Non-conservative	N11-2675
A576S	Non-conservative	Lineage I strains
A576D	Non-conservative	WLSC1019
A607T	Non-conservative	Lineage I & III strains
1 Amino acid positions are relative to L. monocytogenes EGDe OatA protein
Table S14. Hpt amino acid sequence comparison
Amino acid position and substitution1	Type of amino acid substitution	Strains	Remarks
K8R	Conservative	all strains have "R" except CC8 and CC9 strains
H11Y	Non-conservative	N11-1850, CC1, CC2 strains
V86A	Non-conservative	all strains have "A" except CC8 and CC9 strains
I102V	Conservative	Lm3136, Lm3163, N11-1515, N05-195, 10403S, N11-2183, CC412 strains
A116T	Non-conservative	all strains have "T" except CC8 and CC9 strains
I123V	Conservative	WLSC1019
A224T	Non-conservative	N05-195
E235D	Conservative	Lm3136, Lm3163, N11-1515, N05-195, 10403S, N11-2183, CC412 strains
L247F	Non-conservative	Lm3136, Lm3163, N11-1515, N05-195, 10403S, N11-2183, CC412 strains
M414I	Non-conservative	N05-195, N11-1515, Lm3136, lineage I & III strains
F417L	Non-conservative	LMNC318, LMNC326
N420T	Non-conservative	N11-1515, Lm3136, lineage I & III strains
1 Amino acid positions are relative to L. monocytogenes EGDe Hpt protein
Table S15. MdrM amino acid sequence comparison
Amino acid position and substitution1	Type of amino acid substitution	Strains	Remarks
N62S	Non-conservative	N05-195
V202I	Conservative	Lineage I & III strains
V241A	Non-conservative	N05-195
V241L	Non-conservative	N11-1850
E452K	Non-conservative	F2365
T453R	Non-conservative	F2365
A454P	Non-conservative	F2365
L456*	PMSC	F2365	Truncated at 455aa long. A single nucleotide "G" deletion at position 1354 caused a frame shift leading to a PMSC downstrean.
K488E	Non-conservative	N11-2675, lineage III strains
1 Amino acid positions are relative to L. monocytogenes EGDe MdrM protein
Table S16. LapB amino acid sequence comparison
Amino acid position and substitution1	Type of amino acid substitution	Strains	Remarks
I7T	Non-conservative	Lineage I strains
T11I	Non-conservative	Lineage I strains
S15A	Non-conservative	Lineage I strains
D35N	Non-conservative	N11-1850, & CC1 strains
N67S	Non-conservative	Lineage I strains
F152I	Non-conservative	CC8 strains
T166A	Non-conservative	Lineage I strains
N194T	Non-conservative	Lm3163
V209I	Conservative	Lm3163, & CC8 strains
T231I	Non-conservative	Lineage I strains
V281I	Conservative	Lineage I strains
A296I	Non-conservative	CC8 strains
T369A	Non-conservative	Lineage I strains except CC2 strains
Y466S	Non-conservative	CC6 strains
P487S	Non-conservative	CC6 strains
V526I	Conservative	Lineage I strains
V542E	Non-conservative	Lm3163
V565I	Conservative	Lineage I strains
I568L	Conservative	Lineage I strains
H599Y	Non-conservative	10403S
N640S	Non-conservative	Lineage I strains
D673E	Conservative	H34, CC6 strains
N675S	Non-conservative	Lineage I strains
S689N	Non-conservative	Lineage I strains
A711V	Non-conservative	CC6 strains
E864Q	Non-conservative	Lineage I strains
Q842*	PMSC	Lm3163
P892S	Non-conservative	CC8 strains
I939T	Non-conservative	Lineage I strains
L944Q	Non-conservative	All strains except CC9 strains
T947A	Non-conservative	Lineage I strains
I998V	Conservative	Lineage I strains
T1002I	Non-conservative	Lineage I strains
E1010K	Non-conservative	N11-2183
I1029V	Conservative	Lineage I strains
T1032A	Non-conservative	Lineage I strains
T1051R	Non-conservative	N11-1850, & CC1 strains
P1052T	Non-conservative	CC8 strains
S1060N	Non-conservative	Lineage I strains
T1064A	Non-conservative	Lineage I strains
I1068K	Non-conservative	Lineage I strains
V1072I	Conservative	Lineage I strains
I1074V	Conservative	Lineage I strains
1082---------1092	Non-conservative	N13-0047	9aa (PPVITADTT) deletion at position 1083 to 1091, arising due to a 27 nucleotide deletion at 3246 tp 3272
I1126N	Non-conservative	Lineage I strains
S1140A	Non-conservative	Lineage I strains
V1141I	Conservative	Lineage I strains
V1156I	Conservative	N11-1515, & Lineage I strains
S1171N	Non-conservative	N11-1515
T1214S	Conservative	Lineage I strains
S1221A	Non-conservative	N11-1515, & Lineage I strains
S1225N	Non-conservative	CC4 strains
T1237I	Non-conservative	Lineage I strains except N11-2675, H34, & CC6 strains
I1245V	Conservative	N11-2183
V1262A	Non-conservative	Lm3136, N11-2183, N11-1515, & Lineage I strains
T1280I	Non-conservative	N11-1515, & Lineage I strains
T1286A	Non-conservative	N11-1515
A1289T	Non-conservative	Lineage I strains
A1289E	Non-conservative	N11-1515
T1295K	Non-conservative	Lineage I strains
E1303D	Conservative	Lineage I strains
N1305D	Non-conservative	Lineage I strains
E1307K	Non-conservative	N11-2183
A1330T	Non-conservative	N11-1515, & Lineage I strains
I1374T	Non-conservative	10403S, N11-1515, CC8, & Lineage I strains
T1393K	Non-conservative	N11-2675
I1394M	Non-conservative	All strains except CC9 strains
T1399N	Non-conservative	Lineage I strains
K1428N	Non-conservative	Lineage I strains
P1436A	Non-conservative	Lineage I strains
S1438N	Non-conservative	10403S, & CC8 strains
R1457Q	Non-conservative	10403S, CC8, & Lineage I strains
K1470R	Conservative	CC8 strains
T1491M	Non-conservative	10403S, & CC8 strains
T1496V	Non-conservative	Lineage I strains
K1506R	Conservative	Lineage I strains
V1526I	Conservative	N11-2675
D1531E	Conservative	Lm3136, N11-2183, N11-1515
I1547T	Non-conservative	Lineage I strains
K1564T	Non-conservative	All strains except CC9 strains
V1576D	Non-conservative	Lineage I strains
G1581E	Non-conservative	Lm3136, N11-2183, N11-1515,10403S, & CC8 strains
T1589A	Non-conservative	Lm3136, N11-2183, N11-1515,10403S, & CC8 strains
T1597M	Non-conservative	Lm3136, N11-2183, N11-1515,10403S, & CC8 strains
P1608K	Non-conservative	Lineage I strains
K1610T	Non-conservative	Lineage I strains
K1642-	Non-conservative	Lineage I except H34	Arising due to nucleotide (T) deletion at position 4923
K1642P	Non-conservative	H34	Arising due to SNP T4923G
1642PT1643 insetion	Non-conservative	H34	Arising due to a 6 nucleotide (GCCGCC) insertion between position 4922 and 4923
1642T1643 insetion	Non-conservative	Lineage I except H34	Arising due to a single nucleotide (G) insertion between position 4922 and 4923
1646PTPPTP1647 insetion	Non-conservative	N11-1850, CC4, & CC2 except Scott A	Arising due to a 18 nucleotide insertion between position 4938 and 4939
1654N1655 insetion	Non-conservative	Lineage I	Arising due to a 3 nucleotide (AAC) insertion between position 4962 and 4963
G1661D	Non-conservative	Lineage I strains
S1662R	Non-conservative	Lineage I strains
T1664A	Non-conservative	Lineage I strains
D1665N	Non-conservative	Lineage I strains
T1688A	Non-conservative	N11-1850, & CC4 strains
T1689T	Non-conservative	Lineage I strains
1 Amino acid positions are relative to L. monocytogenes EGDe LapB protein
	LapB length (aa)
	841	Lm3163
	1703	N13-0047
	1711	Lineage II except Lm3163
	1712	Scott A, N11-2675, CC6, and CC1 except N13-0047
	1714	H34
	1718	N11-1850, CC4 and CC2 strains except Scott A
Table S17. Iap amino acid sequence comparison
Amino acid position and substitution1	Type of amino acid substitution	Strains	Remarks
I22F	Non-conservative	N11-2675
N70T	Non-conservative	Lineage III strains
70EV71 insertion	Non-conservative	Lineage III strains
N71-	Non-conservative	lineage I strains
A75K	Non-conservative	lineage III strains
A76T	Non-conservative	lineage III strains
T79Q	Non-conservative	lineage III strains
S92T	Conservative	10403S, lineage III strains
T114S	Conservative	lineage I strains
H121N	Non-conservative	lineage I strains
K129E	Non-conservative	lineage I strains
A142V	Non-conservative	Lineage I & III strains
V143A	Non-conservative	Lineage I & III strains
A148T	Non-conservative	lineage III strains
T149P	Non-conservative	lineage III strains
T157A	Non-conservative	lineage III strains
T159I	Non-conservative	CC1 strains
Q160E	Non-conservative	lineage III strains
A165V	Non-conservative	10403S
V185A	Non-conservative	lineage III strains
A202T	Non-conservative	lineage III strains
A249V	Non-conservative	CC1 strains
T257K	Non-conservative	lineage I strains
V269A	Non-conservative	lineage III strains
278N279 insertion	Non-conservative	Lineage I strains
A279T	Non-conservative	CC1 strains
A287T	Non-conservative	WLSC1019, WLSC1020
A287-	Non-conservative	Lineage I strains
A296T	Non-conservative	CC8 strains
307AP308 insertion	Non-conservative	lineage III strains
T309I	Non-conservative	N11-2183
319--322	Non-conservative	lineage III	2aa (TN) deletion at position 320 & 321
321--324	Non-conservative	Lineage I& III except N11-2675 & H34	2aa (TN) deletion at position 322 & 323
323--326	Non-conservative	10403S, N11-1515,Lm3136, N05-195, CC412, linege I & III strains except H34	2aa (TN) deletion at position 324 & 325
325--328	Non-conservative	10403S, N11-1515,Lm3136, N05-195, CC8, CC412, linege I & III strains	2aa (TN) deletion at position 326 & 327
327--33O	Non-conservative	10403S, N11-2292	2aa (TN) deletion at position 328 to 329
329--------------------350	Non-conservative	N11-2292	20aa (TNTNNTNTNTPSKNTNTNSNTNTNTN) deletion at position 330 to 349
327TN328 insertion	Non-conservative	CC9 except EGDe	2aa insertion
341------348	Non-conservative	CC6 & lineage III strains	6aa (SNTNTN) deletion at position 342 to 347
351--354	Non-conservative	WLSC1019, WLSC1020	2aa (TN) deletion at position 352 & 353
1 Amino acid positions are relative to L. monocytogenes EGDe Iap protein
	Iap length (aa)
	454	N1-2292
	469	CC6 strains
	470	WLSC1019, WLSC1020
	472	LMNC318, LMNC326
	475	N11-1850, CC1, CC2, & CC4 strains except N11-2292
	476	10403S
	477	N11-2675
	478	Lm3136, N05-195, N11-1515, & CC412 strains
	479	H34
	480	CC8 strains
	482	EGDe, Lm3163, N11-2183
	484	CC9 strains except EGDe

## Sheet: Table S18 to S24
Table S18: LisK amino acid sequence comparison
Amino acid position and substitution1	Type of amino acid substitution	Strains	Remarks
S111N	Non-conservative	CC412 & Lineage I strains
F119L	Non-conservative	N11-2675
1 Amino acid positions are relative to L. monocytogenes EGDe LisK protein
Table S19: VirR (Lmo1745) amino acid sequence comparison
Amino acid position and substitution1	Type of amino acid substitution	Strains	Remarks
V30T	Non-conservative	CC412 strains
L48I	Conservative	N12-0432, N12-0973	Both CC2 strains
1 Amino acid positions are relative to L. monocytogenes EGDe VirR protein
Table S20: VirS (Lmo1741) amino acid sequence comparison
Amino acid position and substitution1	Type of amino acid substitution	Strains	Remarks
L7I	Conservative	All strains except 10403S, Lm3136, N11-1515 & CC9 strains
S65N	Non-conservative	Lineage I strains
Y66F	Conservative	N11-2292 a CC1 strain
G249S	Non-conservative	Lineage I strains
G262E	Non-conservative	Lineage I strains
M268I	Non-conservative	Lineage I strains
1 Amino acid positions are relative to L. monocytogenes EGDe VirS protein
Table S21: DltA amino acid sequence comparison
Amino acid position and substitution1	Type of amino acid substitution	Strains	Remarks
K47N	Non-conservative	Lineage III strains
N48T	Non-conservative	CC4 strains
I50N	Non-conservative	Lineage I & III strains
V69I	Conservative	Lineage III strains
K97N	Non-conservative	N11-2675
M104L	Non-conservative	Lineage I strains
N113S	Non-conservative	Lineage I & III strains
T124S	Conservative	Lineage III strains
D126E	Conservative	Lineage III strains
G137D	Non-conservative	Lineage III strains
E143A	Non-conservative	Lineage III strains
A144E	Non-conservative	Lineage III strains
N147K	Non-conservative	Lineage I & III strains
D184N	Non-conservative	N13-1054
S188R	Non-conservative	Lineage III strains
P220S	Non-conservative	N11-2292
I236L	Conservative	H34
L241F	Non-conservative	Lineage III strains
E258D	Conservative	Lineage I strains
R267S	Non-conservative	Lineage III strains
R267G	Non-conservative	Lineage I strains
T269I	Non-conservative	Lineage I strains
R270H	Non-conservative	CC4 strains
S284T	Conservative	Lineage III strains
D288N	Non-conservative	Lineage I strains
I317L	Conservative	Lineage III strains
I317V	Conservative	Lineage I strains
D319E	Conservative	Lineage III strains
V345I	Conservative	H34, Lineage III strains
V355I	Conservative	Lineage III strains
R386H	Conservative	Lineage III strains
T455N	Non-conservative	Lineage I & III strains
K470N	Non-conservative	Lineage I & III strains
D490E	Conservative	Lineage I & III strains
S503A	Non-conservative	Lineage I & III strains
1 Amino acid positions are relative to L. monocytogenes EGDe DltA protein
Table S22: DltB amino acid sequence comparison
Amino acid position and substitution1	Type of amino acid substitution	Strains	Remarks
T39I	Non-conservative	Lm3136
A55T	Non-conservative	WLSC1020
R80Q	Non-conservative	Lm3136, N05-195, CC8, Lineage I & III strains
V98I	Conservative	Lm3136, N05-195, CC8, Lineage I & III strains
H109N	Non-conservative	Lm3136, N05-195, CC8, Lineage I & III strains
T126A	Non-conservative	Lm3136, N05-195, CC8, Lineage I & III strains
T217S	Conservative	Lineage III strains
N219H	Non-conservative	Lineage I strains
V220A	Non-conservative	Lineage III strains
T222L	Non-conservative	Lineage III strains
S225N	Non-conservative	Lineage III strains
S284F	Non-conservative	N12-0794
F297L	Non-conservative	Lineage III strains
F350I	Non-conservative	Lineage III strains
H357Y	Non-conservative	H34, CC2 strains
I372F	Non-conservative	Lineage I strains
1 Amino acid positions are relative to L. monocytogenes DltB protein
Table S23: DltC amino acid sequence comparison
Amino acid position and substitution1	Type of amino acid substitution	Strains	Remarks
V7I	Conservative	N843_15
K49R	Conservative	Lineage III strains
1 Amino acid positions are relative to L. monocytogenes EGDe DltC protein
Table S24: DltD amino acid sequence comparison
Amino acid position and substitution1	Type of amino acid substitution	Strains	Remarks
A17V	Non-conservative	CC2 strains
K32H	Non-conservative	Lineage III strains
D36K	Non-conservative	Lineage III strains
D36E	Conservative	Lineage I strains
S41G	Non-conservative	Lineage III strains
Y48S	Non-conservative	Lineage III strains
K58E	Non-conservative	Lineage III strains
Q61K	Non-conservative	Lineage III strains
P79S	Non-conservative	Lineage III strains
N90D	Non-conservative	WLSC1019
V127I	Conservative	Lineage III strains
S175T	Conservative	Lineage III strains
K186T	Non-conservative	Lineage III strains
N207K	Non-conservative	Lineage III strains
T209K	Non-conservative	Lineage III strains except WLSC1020
V212I	Conservative	Lineage I strains
Y227F	Conservative	Lineage III strains
I229T	Non-conservative	Lineage III strains
D234E	Conservative	Lineage III strains
R235F	Non-conservative	Lineage III strains
S237D	Non-conservative	Lineage III strains
S237N	Non-conservative	Lineage I strains
K238D	Non-conservative	Lineage III strains
E242A	Non-conservative	Lineage III strains
E245D	Conservative	Lineage III strains
T246N	Non-conservative	Lineage III strains
Q250K	Non-conservative	Lineage III strains
Q251K	Non-conservative	Lineage I strains
E254N	Non-conservative	Lineage III strains
R262K	Conservative	Lineage III strains
V271I	Conservative	Lineage III strains
H274R	Non-conservative	Lineage III strains
I283F	Non-conservative	Lineage III strains
K286E	Non-conservative	Lineage III strains
N289D	Non-conservative	Lineage III strains
D293E	Conservative	Lineage III strains
A315V	Non-conservative	N05-195
A315T	Non-conservative	Lm3136
D337N	Non-conservative	Lineage III strains
D343G	Non-conservative	Lineage III strains
I398V	Conservative	Lineage III strains
I398M	Non-conservative	N05-195, 10403S, N11-2183, & Lineage I strains
K403R	Conservative	Lineage III strains
E408D	Conservative	Lineage III strains
P419Q	Non-conservative	10403S, N11-1515
R423Q	Non-conservative	Lineage III strains
1 Amino acid positions are relative to L. monocytogenes EGDe DltD protein

## Sheet: Table S25 to S33
Table S25: PrsA2 amino acid sequence comparison
Amino acid position and substitution1	Type of amino acid substitution	Strains	Remarks
M12V	Non-conservative	Lineage III strains
K37Q	Non-conservative	Lineage I strains
E39D	Conservative	H34
T93A	Non-conservative	All strains except CC9 strains
T126V	Non-conservative	Lineage III strains
E162A	Non-conservative	Lineage I & III strains
D179E	Conservative	Lineage III strains
D288E	Conservative	N11-2675, CC4 strains
S289K	Non-conservative	WLSC1019
D290E	Non-conservative	Lineage III strains
S292P	Non-conservative	N11-1515
1 Amino acid positions are relative to L. monocytogenes EGDe PrsA2 protein
Table S26: IspA amino acid sequence comparison
Amino acid position and substitution1	Type of amino acid substitution	Strains	Remarks
V66I	Conservative	Lineage III strains
V104I	Conservative	Lineage III strains
S131A	Non-conservative	Lineage I & III strains
1 Amino acid positions are relative to L. monocytogenes EGDe IspA protein
Table S27: YajC amino acid sequence comparison
Amino acid position and substitution1	Type of amino acid substitution	Strains	Remarks
3G4 insertion	Non-conservative	LMNC318, LMNC326	arising due to TGG insertion between nucleotide position 5 & 6
S90-	Non-conservative	Lineage III strains	arising due to a 12 base "GGTTTCTAATCC" deletion at position 264 to 275
N91-	Non-conservative	Lineage III strains
P92-	Non-conservative	Lineage III strains
V93-	Non-conservative	Lineage III strains
A95T	Non-conservative	Lineage III strains
T98A	Non-conservative	Lineage III strains
A88G	Non-conservative	Lineage III strains
1 Amino acid positions are relative to L. monocytogenes EGDe MprE protein
Table S28: SecE amino acid sequence comparison
Amino acid position and substitution1	Type of amino acid substitution	Strains	Remarks
K6R	Conservative	Lineage I & III strains
1 Amino acid positions are relative to L. monocytogenes EGDe SecE protein
Table S29: SecA2 amino acid sequence comparison
Amino acid position and substitution1	Type of amino acid substitution	Strains	Remarks
D54E	Conservative	Lineage III strains
I58V	Conservative	Lineage III strains
I156K	Non-conservative	Lineage III strains
A157E	Non-conservative	Lineage III strains
T231K	Non-conservative	10403S, & Lineage III strains
K234E	Non-conservative	Lineage III strains
K237E	Non-conservative	Lineage III strains
K265R	Conservative	Lineage III strains
E270D	Conservative	Lineage III strains
D304N	Non-conservative	Lineage III strains
G497D	Non-conservative	N11-1514, N11-1837
A553T	Non-conservative	Lineage I strains
N567K	Non-conservative	WLSC1019
P643S	Non-conservative	Lineage III strains
I665V	Conservative	Lineage III strains
E674D	Conservative	Lineage I strains
K688N	Non-conservative	WLSC1019,WLSC1020
A695V	Non-conservative	Lineage III strains
Q748L	Non-conservative	Lineage III strains
1 Amino acid positions are relative to L. monocytogenes EGDe SecA2 protein
Table S30: SecDF amino acid sequence comparison
Amino acid position and substitution1	Type of amino acid substitution	Strains	Remarks
T67A	Non-conservative	Lineage III strains
V73I	Conservative	Lineage I & III strains
N88D	Non-conservative	Lineage I & III strains
A102S	Non-conservative	N11-2183
A102E	Non-conservative	Lineage I & III strains
E227D	Conservative	Lineage I & III strains
I267M	Non-conservative	Lineage III strains
S285C	Non-conservative	CC8, Lineage I & III strains
L455M	Non-conservative	N11-1850
A462V	Non-conservative	CC8 strains
I473F	Non-conservative	LMNC318, LMNC326
R475K	Conservative	CC8 & Lineage III strains
T507A	Non-conservative	N11-2183, CC8, Lineage I & III strains
D509N	Non-conservative	N11-2675, CC6 strains
G521D	Non-conservative	WLSC1020
D663N	Non-conservative	Lineage I strains
K755R	Conservative	Lineage III strains
1 Amino acid positions are relative to L. monocytogenes EGDe SecD/SecF protein
Table S31: SecA amino acid sequence comparison
Amino acid position and substitution1	Type of amino acid substitution	Strains	Remarks
D310E	Conservative	Lineage III strains
H473N	Non-conservative	Lineage III strains
Y408F	Conservative	Lineage III strains
E706A	Non-conservative	N05-195
A772S	Non-conservative	H34, N11-2675, CC2, CC4 strains
I809V	Conservative	N11-1515, N11-2183, CC412 strains
P820S	Non-conservative	N11-2675
P822S	Non-conservative	N843_10, N843_15
1 Amino acid positions are relative to L. monocytogenes EGDe SecA protein
Table S32: SecY amino acid sequence comparison
Amino acid position and substitution1	Type of amino acid substitution	Strains	Remarks
V123I	Conservative	Lineage III strains
V222I	Conservative	Lineage I strains
1 Amino acid positions are relative to L. monocytogenes EGDe SecY protein
Table S33: YidC amino acid sequence comparison
Amino acid position and substitution1	Type of amino acid substitution	Strains	Remarks
A82S	Non-conservative	N13-2107
S161E	Non-conservative	CC412 7 Lineage III strains
1 Amino acid positions are relative to L. monocytogenes EGDe YidC protein

## Sheet: Table S34
Table S34: SigB amino acid sequence comparison
Amino acid position and substitution1	Type of amino acid substitution	Strains	Remarks
A20D	Non-conservative	N11-2183
Q61R	Non-conservative	N12-1273
A70*	PMSC	N11-1515	N11-1515 has a truncated protein 69aa long due to 5 nucleotide deletion between 177 and 183 (GTTCA) causing a frame shift resulting in a PMSC down stream
L180*	PMSC	N11-2747	N11-2747 has a truncated protein 179aa long due to single nucleotide deletion at position 531 (T) causing a frame shift resulting in a PMSC down stream
Y216F	Conservative	Lineage I & III strains
Q224P	Non-conservative	N12-0367
L249T	Non-conservative	N2306
R250S	Non-conservative	N2306
E251R	Non-conservative	N2306
A252G	Non-conservative	N2306
Q254A	Non-conservative	N2306
N255E	Non-conservative	N2306
E256*	PMSC	N2306	N2306 has a truncated protein 255aa long due to single nucleotide insertion between position 738 and 739 (A) causing a frame shift resulting in a PMSC down stream
1 Amino acid positions are relative to L. monocytogenes EGDe SigB protein

## Sheet: Table S35 to S53
Table S35: BetL amino acid sequence comparison
Amino acid position and substitution1	Type of amino acid substitution	Strains	Remarks
N7S	Non-conservative	Lineage I & III strains
F13C	Non-conservative	Lineage I & III strains
E27I	Non-conservative	CC4 strains
E27K	Non-conservative	Lineage I & III strains except CC4 strains
T31A	Non-conservative	Lineage I strains
N34T	Non-conservative	Lineage I & III strains
H35N	Non-conservative	CC8, CC20, Lineage I & III strains
V230I	Conservative	Lineage I & III strains
V264I	Conservative	N11-2675, WLSC1019, WLSC1020
S378G	Non-conservative	WLSC1019
G394A	Non-conservative	Lineage I & III strains
M397V	Non-conservative	Lineage I & III strains
1 Amino acid positions are relative to L. monocytogenes EGDe BetL protein
Table S36: GbuA amino acid sequence comparison
Amino acid position and substitution1	Type of amino acid substitution	Strains	Remarks
D32E	Conservative	Lineage I strains
D158E	Conservative	Lineage I strains
1 Amino acid positions are relative to L. monocytogenes EGDe GbuA protein
Table S37. GbuB amino acid sequence comparison
Amino acid position and substitution1	Type of amino acid substitution	Strains	Remarks
F59L	Non-conservative	H34, CC1, CC2 strains	No predicted structural change to the protein
1 Amino acid positions are relative to L. monocytogenes EGDe GbuB protein
Table S38. GbuC amino acid sequence comparison
Amino acid position and substitution1	Type of amino acid substitution	Strains	Remarks
A19V	Non-conservative	Lm3136
L53I	Conservative	CC8 strains
H63Q	Non-conservative	WLSC1020
D113E	Conservative	N11-2675, H34
K135E	Non-conservative	N11-1515, N11-2183, Lm3136, & CC412 strains
D180E	Conservative	Lineage I & III strains
1 Amino acid positions are relative to L. monocytogenes EGDe GbuC protein
Table S39: OpuCD amino acid sequence comparison
Amino acid position and substitution1	Type of amino acid substitution	Strains	Remarks
A195V	Non-conservative	N12-0551
P218S	Non-conservative	CC8, CC412 & lineage I strains
1 Amino acid positions are relative to L. monocytogenes EGDe OpuCD protein
Table S40: OpuCC amino acid sequence comparison
Amino acid position and substitution1	Type of amino acid substitution	Strains	Remarks
E275K	Non-conservative	N11-1515
1 Amino acid positions are relative to L. monocytogenes EGDe OpuCC protein
Table S41: OpuCB amino acid sequence comparison
Amino acid position and substitution1	Type of amino acid substitution	Strains	Remarks
V127I	Conservative	N11-1515, N11-2183, CC8, lineage I & III strains
1 Amino acid positions are relative to L. monocytogenes EGDe OpuCB protein
Table S42: OpuCA amino acid sequence comparison
Amino acid position and substitution1	Type of amino acid substitution	Strains	Remarks
D211A	Non-conservative	Lm3136, CC8, lineage I & III strains
L373V	Conservative	N11-2183, CC8, lineage I & III strains
1 Amino acid positions are relative to L. monocytogenes EGDe OpuCA protein
Table S43. ProA (Lmo1259) glutamate-5-semialdehyde dehydrogenase sequence comparison 1
Amino acid position and substitution1	Type of amino acid substitution	Strains	Remarks
A10G	Non-conservative	Lineage I strains
A15S	Non-conservative	Lineage I except CC6 strains
S22T	Conservative	Lm3136, N11-1515, & lineage I and III strains
Q25H	Non-conservative	Lm3136, N11-1515, & lineage I strains
A28T	Non-conservative	lineage III strains
T39I	Non-conservative	Lineage I strains
T39A	Non-conservative	lineage III strains
T39N	Non-conservative	Lm3136 & N11-1515
A42S	Non-conservative	lineage III strains
S43T	Conservative	Lm3136, N11-1515, & lineage I and III strains
E46K	Non-conservative	lineage III strains
E46Q	Non-conservative	Lm3136, N11-1515, & lineage I strains
N49E	Non-conservative	Lm3136, N11-1515, & lineage I and III strains
I53L	Conservative	Lm3136, N11-1515, & lineage I and III strains
R56Q	Non-conservative	Lm3136, N11-1515, CC1, & Lineage III strains
R56K	Conservative	lineage I except CC1 strains
E57K	Non-conservative	lineage III strains
E57Q	Non-conservative	Lm3136, N11-1515, & lineage I strains
E73D	Conservative	Lm3136, N11-1515, & lineage III strains
I75M	Non-conservative	lineage III strains
R187Q	Non-conservative	N11-1850, & CC4 strains only
K206R	Conservative	Lm3136, N11-1515, & lineage I and III strains
H264Q	Non-conservative	10403S
D269E	Conservative	Lm3136, N11-1515, & lineage I and III strains
A270D	Non-conservative	Lm3136, N11-1515, & lineage I and III strains
F271Y	Conservative	Lm3136, N11-1515, & lineage I and III strains
E274A	Non-conservative	lineage I and III strains
I275M	Non-conservative	CC9 strains lack this change
N283D	Non-conservative	lineage I and III strains
N283H	Non-conservative	Lm3136 & N11-1515
R293Q	Non-conservative	Lm3136 & N11-1515
R293K	Conservative	lineage I and III strains
E294G	Non-conservative	N11-2675, N11-1850, Lm3136, N11-1515, CC1, CC4, & Lineage III strains except WLSC1019
I295F	Non-conservative	Lm3136 & N11-1515
K297Q	Non-conservative	lineage I and III strains
D298E	Conservative	Lm3136, N11-1515, & lineage I and III strains
S299A	Non-conservative	Lm3136, N11-1515, & lineage I and III strains
7303K	Non-conservative	H34, WLSC1019, & CC2 strains
W307Y	Non-conservative	Lm3136 & N11-1515
I318V	Conservative	lineage I and III strains
V324A	Non-conservative	Lm3136, N11-1515, lineage I & III strains
D325E	Conservative	Lm3136, N11-1515, & lineage I and III strains
N329E	Non-conservative	H34, N11-1515, Lm3136, CC2 , and lineage III strains
N329D	Non-conservative	N11-2675, N11-1850, CC1, CC4, CC6 strains
1 Amino acid positions are relative to L. monocytogenes EGDe ProA protein
Table S44. ProB amino acid sequence comparison
Amino acid position and substitution1	Type of amino acid substitution	Strains	Remarks
P67S	Non-conservative	N11-2675, H34, N11-1850, CC1, CC4, & CC6 strains
V68A	Non-conservative	N11-1515, Lm3136
T71S	Conservative	N11-1515, Lm3136
S72N	Non-conservative	WLSC1020
E75D	Conservative	Lineage I & III strains
Q76L	Non-conservative	Lineage I & III strains
E126D	Conservative	Lineage I & III strains
E130S	Non-conservative	Lineage I & III strains
S188T	Conservative	Lineage III strains
S188A	Non-conservative	Lineage I strains
D192E	Non-conservative	Lineage I & III strains
K213R	Conservative	Lineage I & III strains
N234E	Non-conservative	Lineage III strains
N234D	Non-conservative	Lineage I strains
A235S	Non-conservative	Lineage I & III strains
I249V	Conservative	Lineage I & III strains
D252N	Non-conservative	Lineage I & III strains except N11-1850
D252K	Non-conservative	N11-1850
I259V	Conservative	Lm3136, N11-1515, & lineage III strains
G274R	Non-conservative	Lineage I & III strains
F270L	Non-conservative	Lineage I & III strains
1 Amino acid positions are relative to L. monocytogenes EGDe ProB protein
Table S45: ClpC amino acid sequence comparison
Amino acid position and substitution1	Type of amino acid substitution	Strains	Remarks
D473	Conservative	Lineage I strains
K489I	Non-conservative	N11-2675
T675I	Non-conservative	Lineage I & III strains
S748A	Non-conservative	Lineage III strains
S814A	Non-conservative	Lineage I & III strains
A819T	Non-conservative	Lineage I strains
D421E	Conservative	Lineage III strains
1 Amino acid positions are relative to L. monocytogenes EGDe ClpC protein
Table S46: ClpP amino acid sequence comparison
Amino acid position and substitution1	Type of amino acid substitution	Strains	Remarks
N109S	Non-conservative	Lineage III strains
1 Amino acid positions are relative to L. monocytogenes EGDe ClpP protein
Table S47: CspB amino acid sequence comparison
Amino acid position and substitution1	Type of amino acid substitution	Strains	Remarks
G22S	Non-conservative	N11-2675, N12-1608	No predicted structural change to the protein
1 Amino acid positions are relative to L. monocytogenes EGDe CspB protein
Table S48: RelA amino acid sequence comparison
Amino acid position and substitution1	Type of amino acid substitution	Strains	Remarks
P508S	Non-conservative	Lineage I & III strains
A513T	Non-conservative	Lineage I & III strains
A514P	Non-conservative	Lineage I & III strains
D616A	Non-conservative	Lineage I strains
E641G	Non-conservative	N11-2675
1 Amino acid positions are relative to L. monocytogenes EGDe RelA protein
Table S49: CtC amino acid sequence comparison
Amino acid position and substitution1	Type of amino acid substitution	Strains	Remarks
G67D	Non-conservative	LMNC318, LMNC326
1 Amino acid positions are relative to L. monocytogenes EGDe CtC protein
Table S50: DtpT amino acid sequence comparison
Amino acid position and substitution1	Type of amino acid substitution	Strains	Remarks
N4K	Non-conservative	Lineage I & III strains
E6G	Non-conservative	CC4 strains
K87Q	Non-conservative	Lineage I & III strains
V98I	Conservative	Lineage III strains except WLSC1019
L105I	Conservative	Lineage III strains
N107S	Non-conservative	Lineage III strains
Y178F	Conservative	Lineage I strains
R217K	Conservative	CC6 strain
T224I	Non-conservative	CC6 strain
V231I	Conservative	10403S
T242S	Conservative	Lineage III strains
A280P	Non-conservative	Lineage III strains
M325I	Non-conservative	Lineage III strains except WLSC1019
M325L	Non-conservative	WLSC1019
A456P	Non-conservative	Lineage III strains
A474C	Non-conservative	N12-0341
I475G	Non-conservative	N12-0341
I475V	Conservative	Lineage I & III strains except N12-0341
A476S	Non-conservative	N12-0341
L477I	Conservative	N12-0341
F478I	Non-conservative	N12-0341
I479H	Non-conservative	N12-0341
A481R	Non-conservative	N12-0341
P482A	Non-conservative	N12-0341
F483I	Non-conservative	N12-0341
K485E	Non-conservative	N12-0341
Y487I	Non-conservative	N12-0341
M488Y	Non-conservative	N12-0341
K489E	Non-conservative	N12-0341
Y491R	Non-conservative	N12-0341
H492S	Non-conservative	N12-0341
*493LKELSALSPYLEEVFFYARNKLVCH	Non-conservative	N12-0341	N12-0341 is longer by 25aa due to a single nucleotide "T" insertion between position 1419 and 1420 which causes a frameshift disrupting the stop codon
1 Amino acid positions are relative to L. monocytogenes EGDe DtpT protein
Table S51: HtrA amino acid sequence comparison
Amino acid position and substitution1	Type of amino acid substitution	Strains	Remarks
N14K	Non-conservative	Lineage III strains
D24E	Conservative	WLSC1019
P29N	Non-conservative	WLSC1019
A32S	Non-conservative	WLSC1019
S76P	Non-conservative	Lineage I & III strains except WLSC1019
T insertion	Non-conservative	N11-1515, N05-195, 10403S, Lm3136, & CC412 strains	Amino acid "T" insertion between aa position 98 - 99, arising due to a 3 nucleotide "CTA" insertion between 292 and 293
N102*	PMSC	N843_15	N843_15 HtrA is tuncated (101aa long), arising due to single nucleotide "A" deletion at position 148 that results in a frame shift generating a PMSC down stream
N102S	Non-conservative	WLSC1019
A274T	Non-conservative	Lm3136
T270S	Conservative	WLSC1019
1 Amino acid positions are relative to L. monocytogenes EGDe HtrA protein
Table S52: TreA amino acid sequence comparison
Amino acid position and substitution1	Type of amino acid substitution	Strains	Remarks
K40E	Non-conservative	Lm3163, N05-195, N11-1515, N11-2183, Lm3136, CC8, & CC412 strains
P117T	Non-conservative	CC8 strains
P127Q	Non-conservative	Lm3163, N05-195, N11-1515, N11-2183, Lm3136, CC8, & CC412 strains
A130V	Non-conservative	Lm3163, N05-195, N11-1515, N11-2183, Lm3136, CC8, & CC412 strains
D152G	Non-conservative	Lm3163, N05-195, N11-1515, N11-2183, Lm3136, CC8, & CC412 strains
A181D	Non-conservative	All strains except CC9 strains
G214S	Non-conservative	WLSC1020
R218S	Non-conservative	N05-195
P242A	Non-conservative	Lm3163, N05-195, N11-1515, N11-2183, Lm3136, CC8, & CC412 strains
I244V	Conservative	10403S, Lineage III strains
T303M	Non-conservative	CC1 strains
D310E	Conservative	Lm3163, N05-195, N11-1515, N11-2183, Lm3136, CC8, CC412 & Lineage I strains
T374S	Conservative	10403S, WLSC1020
D376E	Conservative	LMNC318, LMNC326
E402A	Non-conservative	Lineage I strains
Q422P	Non-conservative	LMNC318, LMNC326
N440K	Non-conservative	10403S, N11-1515, Lm3136, Lm3163, CC8 & Lineage III strains
N440S	Non-conservative	Lineage I strains
T446A	Non-conservative	Lineage I strains
T452A	Non-conservative	10403S, WLSC1019, WLSC1020
H468Y	Non-conservative	Lineage I strains
P469S	Non-conservative	LMNC318, LMNC326
Y479C	Non-conservative	10403S, Lineage III strains
L480W	Non-conservative	Lineage I strains
E482D	Conservative	Lineage I strains
S485L	Non-conservative	Lineage I strains
I487F	Non-conservative	N05-195, & CC412 strains
T495I	Non-conservative	Lineage I strains
L498I	Conservative	H34, N11-2675
E507T	Non-conservative	Lineage I strains
K508T	Non-conservative	Lineage I strains
T515N	Non-conservative	Lineage I strains
E521K	Non-conservative	Lineage I strains
R531T	Non-conservative	Lineage I strains
I547M	Non-conservative	N05-195, & CC412 strains
Q548R	Non-conservative	Lineage I strains
*549MKKA	Non-conservative	N05-195, & CC412 strains	Due to a single nucleotide "A" insertion between position 1644 and 1645 resulting in a frame shift that disrupts the stop codon extending the protein by 4aa
1 Amino acid positions are relative to L. monocytogenes EGDe TreA protein
Table S53: OppA amino acid sequence comparison
Amino acid position and substitution1	Type of amino acid substitution	Strains	Remarks
199V	Conservative	Lineage I strains
D299N	Non-conservative	10403S
N395S	Non-conservative	Lineage III strains
Y284L	Non-conservative	N12-1387
A285C	Non-conservative	N12-1387
A286C	Non-conservative	N12-1387
Q287S	Non-conservative	N12-1387
N288K	Non-conservative	N12-1387
K289Q	Non-conservative	N12-1387
N290-	Non-conservative	N12-1387
N291-	Non-conservative	N12-1387
D293Q	Non-conservative	N12-1387
Y294*	PMSC	N12-1387	Truncated at 291aa long due to a PMSC resulting from a single nucleotide (A) insertion between position 848 and 849
1 Amino acid positions are relative to L. monocytogenes EGDe OppA protein

## Sheet: Table S54 to S56
Table S54: Lmo0501 amino acid sequence comparison
Amino acid position and substitution1	Type of amino acid substitution	Strains	Remarks
M1V	Non-conservative	N05-195, N11-2183, Lm3163, & CC8 strains
S103A	Non-conservative	Lineage I & III strains
K169*	PMSC	N12-1921	Truncated at 168aa long due to a PMSC aring from a 2 nucleotide "TT" insertion between position 495 and 496
D233N	Non-conservative	10403S
A439T	Non-conservative	WLSC1019
K507N	Non-conservative	WLSC1019 & CC412 strains
P509S	Non-conservative	CC412 & Lineage III strains
I524T	Non-conservative	All strains except CC9 strains
N667S	Non-conservative	WLSC1020
K670E	Non-conservative	Lm3163
I673V	Conservative	Lineage III strains
1 Amino acid positions are relative to L. monocytogenes EGDe Lmo0501 protein
Table S55: Lmo1078 amino acid sequence comparison
Amino acid position and substitution1	Type of amino acid substitution	Strains	Remarks
K2R	Conservative	Lineage I & III strains	except Lineage I strains H34 and N11-2675
F39Y	Conservative	Lineage I & III strains	except Lineage I strains H34 and N11-2675
A46E	Non-conservative	Lineage III strains
N75L	Non-conservative	Lineage III strains
D84E	Conservative	Lineage I & III strains	except Lineage I strains H34 and N11-2675
V89I	Conservative	Lineage III strains
E91Q	Non-conservative	Lineage I strains	except Lineage I strains H34 and N11-2675
S103A	Non-conservative	Lineage I strains	except Lineage I strains H34 and N11-2675
K116R	Conservative	Lineage III strains
I119V	Conservative	Lineage I & III strains	except Lineage I strains H34 and N11-2675
V125I	Conservative	Lineage I & III strains	except Lineage I strains H34 and N11-2675
Q134E	Non-conservative	Lineage I strains	except Lineage I strains H34 and N11-2675
S135A	Non-conservative	Lineage III strains
T137I	Non-conservative	Lineage I strains	except Lineage I strains H34 and N11-2675
A140S	Non-conservative	Lineage I strains	except Lineage I strains H34 and N11-2675
M144I	Non-conservative	Lineage I strains	except Lineage I strains H34 and N11-2675
D145N	Non-conservative	Lineage I strains	except Lineage I strains H34 and N11-2675
V154I	Conservative	Lineage III strains
N159T	Non-conservative	Lineage I & III strains	except Lineage I strains H34 and N11-2675
R162H	Non-conservative	Lineage I & III strains	except Lineage I strains H34 and N11-2675
D174I	Non-conservative	Lineage I & III strains	except Lineage I strains H34 and N11-2675
K175D	Non-conservative	Lineage III strains
Y175N	Non-conservative	Lineage I strains	except Lineage I strains H34 and N11-2675
V177Y	Non-conservative	Lineage I & III strains	except Lineage I strains H34 and N11-2675
S178D	Non-conservative	Lineage I strains	except Lineage I strains H34 and N11-2675
D179K	Non-conservative	Lineage I & III strains	except Lineage I strains H34 and N11-2675
R180N	Non-conservative	Lineage I & III strains	except Lineage I strains H34 and N11-2675
T185N	Non-conservative	Lineage III strains
T185K	Non-conservative	Lineage I strains	except Lineage I strains H34 and N11-2675
N192D	Non-conservative	Lineage I & III strains	except Lineage I strains H34 and N11-2675
V193P	Non-conservative	Lineage I & III strains	except Lineage I strains H34 and N11-2675
E194S	Non-conservative	Lineage III strains
E194A	Non-conservative	Lineage I strains	except Lineage I strains H34 and N11-2675
D195A	Non-conservative	Lineage III strains
D195N	Non-conservative	Lineage I strains	except Lineage I strains H34 and N11-2675
N199D	Non-conservative	Lineage I & III strains	except Lineage I strains H34 and N11-2675
E211Q	Non-conservative	Lineage I & III strains	except Lineage I strains H34 and N11-2675
K214D	Non-conservative	Lineage I & III strains	except Lineage I strains H34 and N11-2675
Y215F	Conservative	Lineage I & III strains	except Lineage I strains H34 and N11-2675
E220K	Non-conservative	Lineage I & III strains	except Lineage I strains H34 and N11-2675
A221P	Non-conservative	Lineage I & III strains	except Lineage I strains H34 and N11-2675
S223A	Non-conservative	Lineage I & III strains	except Lineage I strains H34 and N11-2675
R235S	Non-conservative	Lineage I & III strains	except Lineage I strains H34 and N11-2675
I239V	Conservative	Lineage I strains	except Lineage I strains H34 and N11-2675
P241R	Non-conservative	Lineage I & III strains	except Lineage I strains H34 and N11-2675
E250Q	Non-conservative	Lineage I strains	except Lineage I strains H34 and N11-2675
E262K	Non-conservative	Lineage III strains
E262Q	Non-conservative	Lineage I strains	except Lineage I strains H34 and N11-2675
L265M	Non-conservative	Lineage I & III strains	except Lineage I strains H34 and N11-2675
K266Q	Non-conservative	Lineage I & III strains	except Lineage I strains H34 and N11-2675
R279A	Non-conservative	Lineage III strains
R279K	Conservative	Lineage I strains	except Lineage I strains H34 and N11-2675
D280L	Non-conservative	Lineage III strains
I282V	Conservative	Lineage III strains
I283D	Non-conservative	Lineage III strains
I283N	Non-conservative	Lineage I strains	except Lineage I strains H34 and N11-2675
R284E	Non-conservative	Lineage III strains
R284D	Non-conservative	Lineage I strains	except Lineage I strains H34 and N11-2675
G286Y	Non-conservative	Lineage I & III strains	except Lineage I strains H34 and N11-2675
D287A	Non-conservative	Lineage III strains
D287N	Non-conservative	Lineage I strains	except Lineage I strains H34 and N11-2675
E288Q	Non-conservative	Lineage I strains	except Lineage I strains H34 and N11-2675
289HKKDK290 insertion	Non-conservative	Lineage I strains except H34 and N11-2675	5aa acid insertion between aa 289 and 290 arising due to a 15 nucleotide "CATAAAAAAGATAAA" insertion between 867 and 868
289HLKDK290 insertion	Non-conservative	Lineage III strains	5aa acid insertion between aa 289 and 290 arising due to a 15 nucleotide "CACTTGAAGGATAAA" insertion between 867 and 868
L289I	Conservative	Lineage I & III strains	except Lineage I strains H34 and N11-2675
1 Amino acid positions are relative to L. monocytogenes EGDe Lmo1078 protein
Table S56: Lmo2085 amino acid sequence comparison
Amino acid position and substitution1	Type of amino acid substitution	Strains	Remarks
R3K	Conservative	Lineage I & III strains
S8G	Non-conservative	Lm3136, N05-195
F9L	Non-conservative	Lineage I & III strains
M13I	Non-conservative	Lineage I & III strains
L16F	Non-conservative	WLSC1019
I18F	Non-conservative	Lineage III strains
S22Y	Non-conservative	H34
S32P	Non-conservative	Lineage III strains
T52A	Non-conservative	Lineage III strains
T52E	Non-conservative	Lineage I strains
Q56V	Non-conservative	Lineage I & III strains
N57D	Non-conservative	Lineage I & III strains
N62D	Non-conservative	CC4 strains
M65Q	Non-conservative	Lineage I & III strains
A69K	Non-conservative	Lineage I & III strains
D72E	Conservative	Lineage I & III strains
T135M	Non-conservative	Lineage I & III strains
N158D	Non-conservative	Lineage I & III strains
T170I	Non-conservative	Lineage I & III strains
A173D	Non-conservative	Lineage I & III strains
N189S	Non-conservative	Lineage I & III strains
V201I	Conservative	Lineage I & III strains
G235F	Non-conservative	Lineage I strains
K237R	Conservative	N05-195, N11-1515, N11-2183, & CC8 strains
T246A	Non-conservative	Lineage III strains
T246V	Non-conservative	Lineage I strains
A251T	Non-conservative	Lineage III strains
S274T	Non-conservative	N05-195, Lm3136, Lm3163, Lineage I & III starains
N277D	Non-conservative	Lineage III strains
K291T	Non-conservative	Lineage I & III strains
S292T	Conservative	Lineage I & III strains
I317M	Non-conservative	CC8, Lineage I & III strains
L332F	Non-conservative	Lineage I strains
A344T	Non-conservative	Lineage III strains
N359D	Non-conservative	Lineage III strains
N359G	Non-conservative	Lineage I strains
P370S	Non-conservative	CC2 strains
N373K	Non-conservative	Lineage I & III strains
T389P	Non-conservative	CC1, CC2, CC6, & Lineage III strains
T389Q	Non-conservative	H34, N11-2675, CC4 strains
K393T	Non-conservative	Lineage I & III strains
A411V	Non-conservative	Lineage I & III strains
Q422*	PMSC	N05-195	Truncated at 421aa long due to a PMSC arising from a SNP at nucleotide position C1264T
A425T	Conservative	Lineage III strains
I440T	Non-conservative	Lineage I & III strains
S452N	Non-conservative	CC412 strains
S452T	Conservative	WLSC1020
A458S	Non-conservative	LMNC318, LMNC326
V471A	Non-conservative	Lineage I & III strains
P474A	Non-conservative	N12-0551
Y477F	Conservative	CC2 strains
A481T	Non-conservative	Lineage I strains
N482K	Non-conservative	All strains except 10403S and CC9 strains
P492S	Non-conservative	CC8 strains
T499S	Non-conservative	CC6 strains
L509K	Non-conservative	Lineage I & III strains
P513S	Non-conservative	Lineage III strains
K515N	Non-conservative	Lineage III strains
A531T	Non-conservative	Lineage III strains
S540K	Non-conservative	All lineage II strains except 10403S and CC9 strains
S540N	Non-conservative	Lineage I & III strains
T546A	Non-conservative	LMNC318, LMNC326
T546I	Non-conservative	Lineage I strains
L549F	Non-conservative	LMNC318, LMNC326
V552A	Non-conservative	Lineage III strains
A553V	Non-conservative	Lineage I strains
F557L	Non-conservative	Lineage III strains
1 Amino acid positions are relative to L. monocytogenes EGDe Lmo2085 protein

## Sheet: Table S57 to S61
Table S57: KdpE amino acid sequence comparison
Amino acid position and substitution1	Type of amino acid substitution	Strains	Remarks
D14E	Conservative	Lineage I & III strains
M61V	Non-conservative	Lineage I & III strains
L96H	Non-conservative	WLSC1019
S129T	Conservative	Lineage III strains
S129A	Non-conservative	Lineage I strains
Y141F	Conservative	Lineage III strains
D152G	Non-conservative	Lineage I & III strains except WLSC1020
D152V	Non-conservative	WLSC1020
T154K	Non-conservative	Lineage I strains
K210Q	Non-conservative	Lineage I strains
1 Amino acid positions are relative to L. monocytogenes EGDe KdpE protein
Table S58: KdpD amino acid sequence comparison
Amino acid position and substitution1	Type of amino acid substitution	Strains	Remarks
T19A	Non-conservative	H34, CC1 strains
V67E	Non-conservative	Lineage I & III strains
S80P	Non-conservative	Lineage I & III strains
N85T	Non-conservative	Lineage I & III strains
A118S	Non-conservative	Lineage I strains
E201A	Non-conservative	Lineage I strains
Q204K	Non-conservative	Lineage I strains
Q204R	Non-conservative	Lineage III strains
V240I	Conservative	Lineage III strains
E354D	Conservative	Lineage I strains
H376Q	Non-conservative	Lineage I & III strains
A379T	Non-conservative	Lineage I & III strains
V401I	Conservative	Lineage I strains
T405A	Non-conservative	Lineage I & III strains
L447M	Non-conservative	Lineage I strains
S462T	Conservative	Lineage I strains
Q518R	Non-conservative	Lineage I strains
N530D	Non-conservative	Lineage I strains
E556K	Non-conservative	Lineage I strains
S573N	Non-conservative	Lineage III strains
V607*	PMSC	H34 truncated
E625D	Conservative	Lineage I strains
I688V	Non-conservative	Lineage I strains
D699T	Non-conservative	Lineage I strains
R707H	Non-conservative	Lineage I strains
R711K	Conservative	Lineage I strains
R763A	Non-conservative	Lineage I strains
T766I	Non-conservative	Lineage III strains
G803S	Non-conservative	Lm3163, Lineage III strains
N831K	Non-conservative	Lineage I strains
A834P	Non-conservative	Lineage I & III strains
D835N	Non-conservative	N05-195
G880S	Non-conservative	N11-2675
1 Amino acid positions are relative to L. monocytogenes EGDe KdpD protein
Table S59: KdpC amino acid sequence comparison
Amino acid position and substitution1	Type of amino acid substitution	Strains	Remarks
I13V	Conservative	Lineage I & III strains
V21M	Non-conservative	Lineage I & III strains
L25V	Conservative	Lineage I & III strains
V291	Conservative	Lineage I & III strains
V32I	Conservative	Lineage I & III strains
G35S	Non-conservative	Lineage I & III strains
V36A	Non-conservative	Lineage I & III strains
L51R	Non-conservative	Lineage I & III strains
T55M	Non-conservative	N05-195
G57R	Non-conservative	WLSC1019
E70K	Non-conservative	Lm3136, N11-1515, N05-195, CC8, & lineage I strains
V83A	Non-conservative	Lineage III strains except WLSC1020
E154Q	Non-conservative	Lineage I & III strains
N165D	Non-conservative	Lineage I & III strains
D131H	Non-conservative	Lm3136
1 Amino acid positions are relative to L. monocytogenes EGDe KdpC protein
Table S60: KdpB amino acid sequence comparison
Amino acid position and substitution1	Type of amino acid substitution	Strains	Remarks
V24L	Conservative	WLSC1019
E53D	Conservative	CC412 strains
V105I	Conservative	Lineage I & III strains
V114I	Conservative	Lineage I & III strains
M369K	Non-conservative	N11-2183
T379N	Non-conservative	Lm3163
H370R	Non-conservative	H34
A402T	Non-conservative	N11-2675, CC2 strains
Q437K	Non-conservative	WLSC1019, lineage I strains
V629I	Conservative	Lineage I & III strains
1 Amino acid positions are relative to L. monocytogenes EGDe KdpB protein
Table S61: KdpA amino acid sequence comparison
Amino acid position and substitution1	Type of amino acid substitution	Strains	Remarks
V9A	Non-conservative	Lineage I strains except N11-2675
L18F	Non-conservative	N11-2675
E42K	Non-conservative	WLSC1020
A81T	Non-conservative	N05-195
M96I	Non-conservative	10403S
V112A	Non-conservative	Lm3163, CC412 strains
T124A	Non-conservative	Lineage I strains except N11-2675
V165I	Conservative	Lineage I strains
I186V	Conservative	Lineage III strains
D202V	Non-conservative	N11-1850
S311H	Non-conservative	Lineage I & III strains except N11-1850
G314S	Non-conservative	WLSC1020
I373V	Conservative	CC4, CC6 strains
V488I	Conservative	LMNC318, LMNC326
L531V	Conservative	WLSC1020
V362E	Non-conservative	Lm3163
1 Amino acid positions are relative to L. monocytogenes EGDe KdpA protein

## Sheet: Table S62 to S65
Table S62: MprA amino acid sequence comparison
Amino acid position and substitution1	Type of amino acid substitution	Strains	Remarks
I43T	Non-conservative	Lm3136
E54D	Conservative	All strains except CC9 strains
E68G	Non-conservative	All strains except CC9 strains
I213V	Conservative	N05-195, N11-2183, Lm3136, 10403S, Lm3163, WLSC1020, CC8, &CC412 strains
V215I	Conservative	Lineage I strains
A512S	Non-conservative	All strains except 10403S and CC9 strains
R556K	Conservative	Lineage I strains
E797K	Non-conservative	H34 & CC6 strains
1 Amino acid positions are relative to L. monocytogenes EGDe MprA protein
Table S63: MprD amino acid sequence comparison
Amino acid position and substitution1	Type of amino acid substitution	Strains	Remarks
R26K	Conservative	Lineage I & III strains
V29I	Conservative	Lineage I & III strains
I46L	Conservative	Lineage I & III strains
I287V	Conservative	Lineage I & III strains
M408I	Non-conservative	All strains except N05-195 and CC9 strains
I210V	Conservative	All strains except CC9 strains
1 Amino acid positions are relative to L. monocytogenes EGDe MprD protein
Table S64: MprE amino acid sequence comparison
Amino acid position and substitution1	Type of amino acid substitution	Strains	Remarks
V58I	Conservative	Lineage III strains
1 Amino acid positions are relative to L. monocytogenes EGDe MprE protein
Table S65: MprG amino acid sequence comparison
Amino acid position and substitution1	Type of amino acid substitution	Strains	Remarks
I14L	Conservative	Lineage I & III strains
S120N	Non-conservative	Lineage I & III strains
S195T	Conservative	Lineage I & III strains
1 Amino acid positions are relative to L. monocytogenes EGDe MprG protein
